# Supplementary material
Source: publisher figshare collection journal article supplement (https://karger.figshare.com/ndownloader/files/8712958)
Supplement: Supplementary file 1 [file 8712958]

## Sheet: Hoja1
Supplementary Table S1. Clinical information of patient's serum samples used in the study.
ZARAGOZA			Prick test (mm)		IgE ELISA
Number	Age	1Symptoms	S. kali	C. album	S. kali ext	C. album ext	Sal k 1	Sal k 4	Polcalcin	2Other sensitization
1	46	Rc, A	12	10	0.82	0.1	<0.1	<0.1	<0.1	Pla
2	27	Rc, A	8	9	<0.1	<0.1	<0.1	1.1	<0.1	Gr, O, A, Pl, Pla, C
3	32	Rc, A	6	6	<0.1	<0.1	<0.1	<0.1	<0.1	Po
4	29	Rc, A	16	12	0.21	0.13	<0.1	2.14	<0.1	Gr, A, Pla, Pl, C
5	40	Rc, A	8	10	<0.1	<0.1	<0.1	<0.1	<0.1	None
6	24	Rc	8	10	0.14	<0.1	0.12	0.15	<0.1	Gr, A, Fel
7	48	Rc	8	7	<0.1	<0.1	<0.1	<0.1	<0.1	None
8	24	Rc	9	8	0.52	0.1	0.39	<0.1	1.03	C, Pla
9	13	Rc, A	7	9	<0.1	<0.1	<0.1	<0.1	<0.1	Gr, O, A, Pla, Pl, C
10	24	Rc, A	9	5	<0.1	<0.1	<0.1	<0.1	<0.1	O, Gr
11	22	Rc	9	9	<0.1	<0.1	0.37	<0.1	<0.1	Gr, O, Pla
12	46	Rc	9	0	<0.1	<0.1	<0.1	<0.1	<0.1	Gr, O, A, Pla, C
13	22	Rc	8	8	<0.1	<0.1	0.13	<0.1	<0.1	A, Pl
14	18	Rc	8	0	1.54	<0.1	<0.1	<0.1	<0.1	Gr, Mu, Pe, Hz, Der
15	22	Rc	14	10	1.80	<0.1	0.20	<0.1	<0.1	Gr, O, Pl, C
16	30	Rc	14	14	0.66	0.10	1.09	<0.1	<0.1	Pl
17	13	Rc	8	8	0.72	0.16	0.13	1.00	<0.1	A, Pla, Pl
18	31	Rc, A	9	9	0.41	0.14	0.52	<0.1	<0.1	C, Pla, Pe
19	39	Rc	9	14	0.32	<0.1	0.48	<0.1	<0.1	None
20	10	Rc	7	6	0.81	<0.1	0.16	<0.1	<0.1	None
21	6	RC, Ae	12	8	0.61	0.11	0.72	<0.1	<0.1	Gr
22	42	Rc, A	12	10	0.64	0.11	1.02	<0.1	<0.1	Gr, O, Pla, C
23	21	Rc	12	20	1.07	0.11	<0.1	<0.1	<0.1	Gr, O, Pla
24	9	Rc	9	7	0.62	<0.1	<0.1	<0.1	<0.1	Gr, Pla, Pl C
25	16	Rc, A	9	7	0.32	<0.1	0.489	<0.1	<0.1	Gr, Pla, C
26	66	Rc	9	9	0.51	<0.1	<0.1	<0.1	<0.1	C, Kw
27	11	Rc	13	7	1.91	<0.1	0.18	<0.1	<0.1	Gr, Pl
28	30	Rc, A	9	11	0.94	0.14	0.523	<0.1	<0.1	A, Mu, P, Al, Hz, Pe, WBe, Gin
29	33	Rc, A	16	12	0.71	0.2	0.461	1.3	<0.1	Gr, O, Pla, A, Pl
1Rc, Rhinoconjunctivitis; A, Asthma; Ae, Angioedema
2Pl, platanus; Gr, Grasses; O, Olive; Pla, Plantago; C, Cupressus; A, Artemisia, Pa, Parietaria; Po, Populus; Mu, Mustard; Pe, Peanut;
Hz, Hazelnut; Kw, Kiwi; P, Peach; Wbe, White bean; Gin, Ginger; Der, Dermatophagoides; Fel, Felix
MURCIA			Prick test (mm)		IgE ELISA
Number	Age	1Symptoms	S. kali	C. album	S. kali ext	C. album ext	Sal k 1	Sal k 4	Polcalcin	2Other sensitization
1	46	Rc, A	12	10	0.82	0.1	<0.1	<0.1	<0.1	Pla
2	37	Rc	15	10	1.18	0.12	0.21	0.71	<0.1	O, Gr, Pla, Pa, A
3	37	Rc, A	8	8	0.36	0.25	0.26	<0.1	<0.1	O, Gr, A, Pla, Pa
4	26	Rc	12	8	<0.1	<0.1	0.12	<0.1	<0.1	O
5	42	Rc	12	7	<0.1	<0.1	<0.1	<0.1	<0.1	nd
6	53	Rc, A	16	13	2.48	0.62	1.08	0.14	<0.1	O, Gr, Pa
7	30	Rc	11	Neg	0.19	<0.1	0.18	<0.1	<0.1	O, Gr, Pa
8	31	Rc	14	9	0.77	0.21	0.18	<0.1	<0.1	A
9	30	Rc, A	10	7	0.27	0.25	<0.1	<0.1	2.22	O, Gr, A, Pa, Pl
10	52	Rc	9	9	0.45	0.34	0.27	<0.1	<0.1	A
11	38	Rc	15	17	<0.1	<0.1	0.18	<0.1	0.34	O, Gr, Pla, Pa, Pl
12	21	Rc	9	8	0.12	<0.1	<0.1	<0.1	0.26	A, Pa, Gr, Pla
13	19	Rc	15	11	0.24	<0.1	<0.1	<0.1	<0.1	Gr, Pl
14	20	Rc	11	16	0.85	<0.1	<0.1	<0.1	<0.1	O, C
15	17	Rc	11	8	0.48	0.18	0.13	<0.1	<0.1	O
16	45	Rc	12	8	0.47	<0.1	0.09	<0.1	<0.1	O, Gr, Pa
17	63	Rc, A	10	7	<0.1	0.11	0.42	<0.1	0.39	O, Gr, Pa
18	33	Rc	10	Neg	<0.1	<0.1	<0.1	<0.1	<0.1	O, Gr
19	36	Rc, A	10	Neg	<0.1	<0.1	<0.1	0.74	2.66	O, A, Pa, Pl
20	55	Rc	11	7	0.42	<0.1	0.30	<0.1	0.79	None
21	62	Rc, A	9	7	0.16	<0.1	<0.1	<0.1	<0.1	O, Gr
22	32	Rc	6	7	0.94	<0.1	0.52	<0.1	<0.1	O, Gr, A
23	47	Rc	14	8	0.25	<0.1	0.19	<0.1	<0.1	O, Gr, A, C, Pl
24	23	Rc	13	11	0.97	0.47	0.92	0.60	2.49	O, Gr, A, Pa, Pla
25	19	Rc	13	10	1.53	0.4	0.77	<0.1	<0.1	O, Pa
26	29	Rc, A	12	11	0.44	0.21	0.72	<0.1	2.62	O, Gr, Pa, A, Pla
27	28	Rc, A	12	9	1.79	0.77	1.54	<0.1	0.39	O, Gr, Pa
28	25	Rc	7	5	0.79	<0.1	1032	<0.1	<0.1	None
1Rc, Rhinoconjunctivitis; A, Asthma; Ae, Angioedema
2Pl, platanus; Gr, Grasses; O, Olive; Pla, Plantago; C, Cupressus; A, Artemisia, Pa, Parietaria
